# Supplementary material for: Evaluating climate geoengineering proposals in the context of the Paris Agreement temperature goals
Source: Springer Nature journal article supplement (doi:10.1038/s41467-018-05938-3), 2018-09-07
Supplement: MOESM1 [file 41467_2018_5938_MOESM1_ESM.pdf]

**Supplementary Table 1: Future CO<sub>2</sub> emissions scenarios, budgets, and gaps to the Paris Agreement temperature goals.**

| Metric and time frame or case                                                                                                                                                                                                                                                              | Values based on current NDCs | Annual Emissions Reduction Rate (2031 – 2100) |            |            |             | 3% annual emissions reduction from 2021 onwards |
|--------------------------------------------------------------------------------------------------------------------------------------------------------------------------------------------------------------------------------------------------------------------------------------------|------------------------------|-----------------------------------------------|------------|------------|-------------|-------------------------------------------------|
|                                                                                                                                                                                                                                                                                            |                              | 0% (constant)                                 | 1%         | 3%         | 5%          |                                                 |
| <u>Annual CO<sub>2</sub> Emissions Rate<sup>a</sup> [Gt(CO<sub>2</sub>)/yr]</u>                                                                                                                                                                                                            |                              |                                               |            |            |             |                                                 |
| 2030                                                                                                                                                                                                                                                                                       | 47 ± 4                       |                                               |            |            |             | 31 ± 0.8                                        |
| 2100                                                                                                                                                                                                                                                                                       |                              | 47 ± 4                                        | 23 ± 2     | 5.5 ± 0.4  | 1.3 ± 0.1   | 3.7 ± 0.1                                       |
| <u>Cumulative CO<sub>2</sub> emissions [Gt(CO<sub>2</sub>)]</u>                                                                                                                                                                                                                            |                              |                                               |            |            |             |                                                 |
| 2015 – 2030                                                                                                                                                                                                                                                                                | 700 ± 37                     |                                               |            |            |             | 600 ± 13                                        |
| 2031 – 2100                                                                                                                                                                                                                                                                                |                              | 3270 ± 260                                    | 2330 ± 180 | 1330 ± 100 | 860 ± 68    | 890 ± 23                                        |
| 2015 – 2100                                                                                                                                                                                                                                                                                |                              | 3970 ± 290                                    | 3030 ± 220 | 2030 ± 140 | 1560 ± 100  | 1490 ± 36                                       |
| <u>Gap to the Remaining Budgets<sup>b</sup> in 2100 [Gt(CO<sub>2</sub>)]</u>                                                                                                                                                                                                               |                              |                                               |            |            |             |                                                 |
| For $\Delta\bar{T}_s$ likely ≤ 1.5°C                                                                                                                                                                                                                                                       |                              | 3320 ± 420                                    | 2380 ± 350 | 1380 ± 270 | 910 ± 230   | 840 ± 170                                       |
| For $\Delta\bar{T}_s$ likely ≤ 2°C                                                                                                                                                                                                                                                         |                              | 2670 ± 420                                    | 1730 ± 350 | 730 ± 270  | 260 ± 230   | 190 ± 170                                       |
| <u>Implied Negative Radiative Forcing Gap<sup>c</sup> to Temperature Limits in 2100 [W/m<sup>2</sup>]</u>                                                                                                                                                                                  |                              |                                               |            |            |             |                                                 |
| For $\Delta\bar{T}_s$ likely ≤ 1.5°C                                                                                                                                                                                                                                                       |                              | 3.2 ± 0.4                                     | 2.3 ± 0.3  | 1.3 ± 0.3  | 0.87 ± 0.23 | 0.81 ± 0.16                                     |
| For $\Delta\bar{T}_s$ likely ≤ 2°C                                                                                                                                                                                                                                                         |                              | 2.6 ± 0.4                                     | 1.7 ± 0.3  | 0.7 ± 0.3  | 0.25 ± 0.23 | 0.18 ± 0.16                                     |
| See Methods for assumptions, computations and conversions.                                                                                                                                                                                                                                 |                              |                                               |            |            |             |                                                 |
| All values are given as the mean of the lower and upper bound values computed for each individual metric, ± half of the difference between the upper and lower bound values.                                                                                                               |                              |                                               |            |            |             |                                                 |
| The reference starting year for the remaining budgets is 2015, for comparability to several other relevant recent studies <sup>1,2</sup> .                                                                                                                                                 |                              |                                               |            |            |             |                                                 |
| <sup>a</sup> Values for 2030 from Ref. 3 (using the lower and upper bounds given in that study).                                                                                                                                                                                           |                              |                                               |            |            |             |                                                 |
| <sup>b</sup> Remaining budgets are computed applying values for the remaining CO <sub>2</sub> budgets derived based on data from an IPCC analysis of model ensemble output <sup>4</sup> (see Methods): 650 ± 130 Gt(CO <sub>2</sub> ) to 1.5°C and 1300 ± 130 Gt(CO <sub>2</sub> ) to 2°C. |                              |                                               |            |            |             |                                                 |
| <sup>c</sup> Values given are for negative radiative forcing, i.e., cooling. The conversion used between CO <sub>2</sub> budget gap values and the radiative forcing gaps is 9.6 x 10 <sup>-4</sup> (W/m <sup>2</sup> )/(Gt(CO <sub>2</sub> )) (see Methods).                              |                              |                                               |            |            |             |                                                 |

## Supplementary References

- 1 Rogelj, J. *et al.* Differences between carbon budget estimates unravelled. *Nature Climate Change* **6**, 245, doi:10.1038/nclimate2868 (2016).
- 2 Millar, R. J. *et al.* Emission budgets and pathways consistent with limiting warming to 1.5 °C. *Nature Geoscience* **10**, 741, doi:10.1038/ngeo3031 (2017).
- 3 Benveniste, H., Boucher, O., Guivarch, C., Le Treut, H. & Criqui, P. Impacts of nationally determined contributions on 2030 global greenhouse gas emissions: uncertainty analysis and distribution of emissions. *Environmental Research Letters*, **13**, 014022, doi:10.1088/1748-9326/aaa0b9 (2018).
- 4 IPCC. Climate Change 2014: Synthesis Report. Contribution of Working Groups I, II and III to the Fifth Assessment Report of the Intergovernmental Panel on Climate Change. *Cambridge University Press*, 151 pp., (2014).
